# Supplementary material
Source: PubMed Central journal article supplement (PMC4547255)
Supplement: pnas.201421397SI.pdf [file pnas.201421397SI.pdf]

# Supporting Information

Wu et al. 10.1073/pnas.1421397112

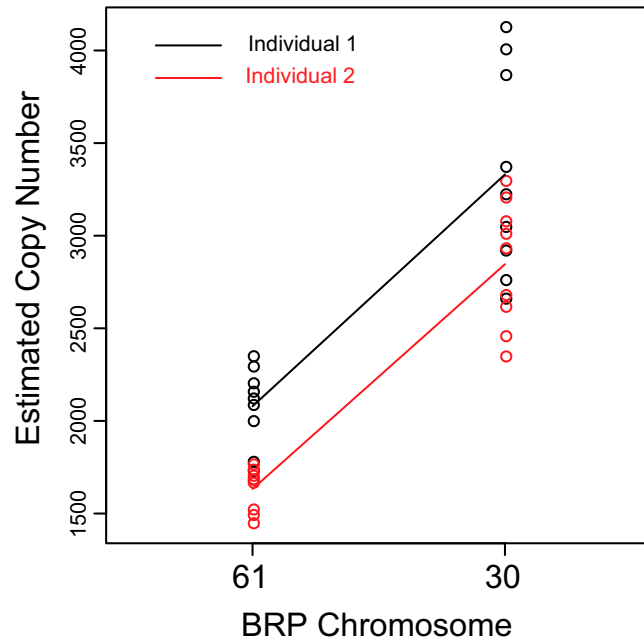

Fig. S1. Absolute qPCR analysis of copy number variation between *Silene noctiflora* BRP mitochondrial chromosomes 30 and 61.

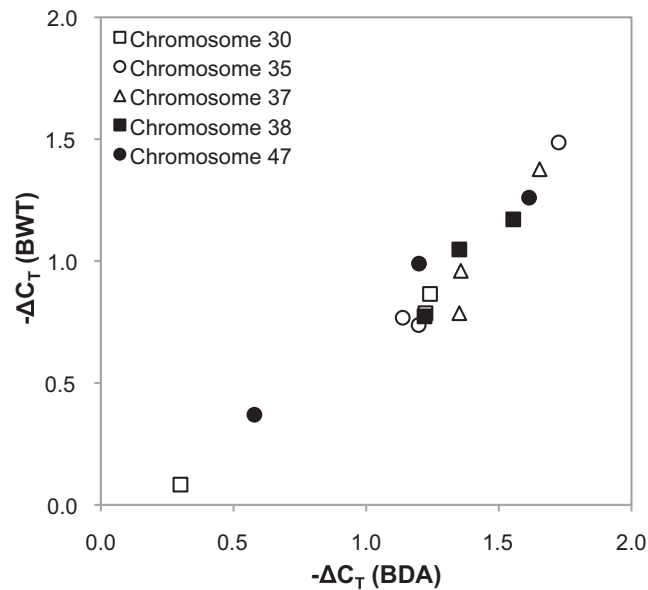

Fig. S2. Relative qPCR analysis of copy number variation among five *S. noctiflora* mitochondrial chromosomes in the BDA and BWT families. The  $\Delta C_T$  values were calculated relative to a nuclear reference gene (*XY4*), and each point represents an average of three biological replicates.

Table S1. Chromosome summary for *S. noctiflora* BRP and OSR mitochondrial genomes

| Genome | Chromosome no. | Length, bp | GC content, % | Intact genes | Gene names                                   | GenBank accession no. | Unique? |
|--------|----------------|------------|---------------|--------------|----------------------------------------------|-----------------------|---------|
| BRP    | 1              | 191,194    | 40.71         | 3            | <i>ccmB-a, rpl5-1, cob</i>                   | KP053825              | N       |
| BRP    | 2              | 160,886    | 40.67         | 1            | <i>ccmFc (exon 1 2)</i>                      | KP053826              | N       |
| BRP    | 3              | 153,950    | 41.18         | 1            | <i>nad1 (exon 2, 3), Ψrps4, ΨtrnI(CAT)</i>   | KP053827              | N       |
| BRP    | 4              | 152,677    | 41.25         | 1            | <i>nad5 (exon 1, 2)</i>                      | KP053828              | N       |
| BRP    | 5              | 148,955    | 41.25         | 3            | <i>trnfM(CAT), rrn18-a, rrn5-a</i>           | KP053829              | N       |
| BRP    | 6              | 147,899    | 40.82         | 2            | <i>atp9, nad1 (exon 5)</i>                   | KP053830              | N       |
| BRP    | 7              | 147,089    | 41.12         | 1            | <i>nad5 (exon 4, 5)</i>                      | KP053831              | N       |
| BRP    | 8              | 140,355    | 40.69         | 2            | <i>nad2 (exon 1, 2), nad6</i>                | KP053832              | N       |
| BRP    | 9              | 139,867    | 40.79         | 1            | <i>ccmC</i>                                  | KP053833              | N       |
| BRP    | 10             | 139,300    | 41.08         | 1            | <i>nad9</i>                                  | KP053834              | N       |
| BRP    | 11             | 134,804    | 41.16         | 1            | <i>nad4 (exon 1, 2, 3)</i>                   | KP053835              | N       |
| BRP    | 12             | 130,045    | 40.82         | 0            | —                                            | KP053836              | N       |
| BRP    | 13             | 129,952    | 40.27         | 0            | <i>ΨtrnN(GTT), ΨtrnQ(TTG)</i>                | KP053837              | N       |
| BRP    | 14             | 127,928    | 40.03         | 0            | —                                            | KP053838              | N       |
| BRP    | 15             | 127,208    | 40.41         | 0            | —                                            | KP053839              | N       |
| BRP    | 16             | 127,125    | 42.28         | 1            | <i>cox1, ΨmttB-2</i>                         | KP053840              | N       |
| BRP    | 17             | 126,908    | 40.34         | 1            | <i>rrn26-a</i>                               | KP053841              | N       |
| BRP    | 18             | 126,794    | 40.85         | 0            | —                                            | KP053842              | N       |
| BRP    | 19             | 126,475    | 40.61         | 0            | —                                            | KP053843              | N       |
| BRP    | 20             | 126,261    | 40.66         | 1            | <i>rrn26-b</i>                               | KP053844              | N       |
| BRP    | 21             | 122,562    | 40.36         | 1            | <i>nad5 (exon 3)</i>                         | KP053845              | N       |
| BRP    | 22             | 120,807    | 40.54         | 0            | <i>ΨccmFn</i>                                | KP053846              | Y       |
| BRP    | 23             | 120,245    | 40.66         | 1            | <i>mttB-1</i>                                | KP053847              | N       |
| BRP    | 24             | 118,597    | 40.73         | 0            | <i>Ψrpl5-2</i>                               | KP053848              | N       |
| BRP    | 25             | 118,216    | 41.15         | 2            | <i>cox3, atp8, ΨtrnfM(CAT)</i>               | KP053849              | N       |
| BRP    | 26             | 117,164    | 39.96         | 0            | <i>ΨccmC</i>                                 | KP053850              | Y       |
| BRP    | 27             | 116,776    | 39.89         | 0            | —                                            | KP053851              | Y       |
| BRP    | 28             | 115,687    | 40.99         | 1            | <i>nad7 (exon 1, 2, 3, 4)</i>                | KP053852              | N       |
| BRP    | 29             | 115,049    | 40.41         | 0            | —                                            | KP053853              | N       |
| BRP    | 30             | 114,891    | 40.82         | 0            | —                                            | KP053854              | N       |
| BRP    | 31             | 114,765    | 40.72         | 0            | —                                            | KP053855              | Y       |
| BRP    | 32             | 112,465    | 42.12         | 2            | <i>matR-a, nad1 (exon 4)</i>                 | KP053856              | N       |
| BRP    | 33             | 108,907    | 40.50         | 0            | —                                            | KP053857              | N       |
| BRP    | 34             | 108,809    | 41.06         | 2            | <i>rrn18-b, rrn5-b</i>                       | KP053858              | N       |
| BRP    | 35             | 108,105    | 41.26         | 1            | <i>nad1 (exon 1)</i>                         | KP053859              | N       |
| BRP    | 36             | 106,455    | 40.58         | 1            | <i>nad3-a</i>                                | KP053860              | N       |
| BRP    | 37             | 103,632    | 40.67         | 0            | —                                            | KP053861              | N       |
| BRP    | 38             | 102,980    | 40.05         | 0            | <i>Ψatp6</i>                                 | KP053862              | Y       |
| BRP    | 39             | 102,297    | 40.15         | 2            | <i>atp6, atp1</i>                            | KP053863              | N       |
| BRP    | 40             | 101,611    | 41.08         | 0            | —                                            | KP053864              | Y       |
| BRP    | 41             | 101,161    | 40.82         | 0            | —                                            | KP053865              | N       |
| BRP    | 42             | 101,035    | 40.47         | 1            | <i>rps13</i>                                 | KP053866              | N       |
| BRP    | 43             | 100,496    | 41.46         | 3            | <i>trnfM(CAT), rrn18-c, rrn5-c</i>           | KP053867              | N       |
| BRP    | 44             | 99,709     | 41.10         | 1            | <i>trnI-CAT</i>                              | KP053868              | N       |
| BRP    | 45             | 98,295     | 41.25         | 2            | <i>rrn18-d, rrn5-d, Ψnad2 (exon 3, 4, 5)</i> | KP053869              | Y       |
| BRP    | 46             | 98,155     | 40.59         | 1            | <i>ccmFn</i>                                 | KP053870              | N       |
| BRP    | 47             | 97,625     | 40.49         | 0            | <i>ΨtrnfM(CAT), Ψrps3</i>                    | KP053871              | N       |
| BRP    | 48             | 96,769     | 40.87         | 0            | <i>ΨtrnQ(TTG)</i>                            | KP053872              | N       |
| BRP    | 49             | 94,695     | 41.18         | 2            | <i>nad2 (exon 3, 4, 5), trnY-GTA</i>         | KP053873              | N       |
| BRP    | 50             | 94,110     | 41.34         | 2            | <i>rrn18-e, rrn5-e</i>                       | KP053874              | Y       |
| BRP    | 51             | 93,608     | 39.91         | 0            | —                                            | KP053875              | N       |
| BRP    | 52             | 92,884     | 41.04         | 1            | <i>rrn26-c</i>                               | KP053876              | N       |
| BRP    | 53             | 92,345     | 40.92         | 0            | —                                            | KP053877              | N       |
| BRP    | 54             | 92,286     | 40.78         | 3            | <i>trnI-CAT, rrn18-f, rrn5-f, ΨtrnW(CCA)</i> | KP053878              | N       |
| BRP    | 55             | 91,549     | 40.82         | 2            | <i>nad3-b, cox2</i>                          | KP053879              | N       |
| BRP    | 56             | 90,680     | 40.98         | 0            | —                                            | KP053880              | N       |
| BRP    | 57             | 89,546     | 40.58         | 0            | <i>Ψatp6</i>                                 | KP053881              | Y       |
| BRP    | 58             | 88,097     | 40.05         | 1            | <i>rrn26-d, Ψrps12</i>                       | KP053882              | N       |
| BRP    | 59             | 83,984     | 40.71         | 1            | <i>trnI-CAT</i>                              | KP053883              | N       |
| BRP    | 60             | 81,391     | 40.98         | 3            | <i>atp4-a, nad4L-a, ccmB-b, ΨtrnI(CAT)</i>   | KP053884              | N       |
| BRP    | 61             | 73,423     | 41.69         | 3            | <i>matR-b, nad1 (exon 4), nad5 (exon 3)</i>  | KP053885              | Y       |
| BRP    | 62             | 65,256     | 40.71         | 3            | <i>atp4-b, nad4L-b, ccmB-c</i>               | KP053886              | N       |

Table S1. Cont.

| Genome | Chromosome no. | Length, bp | GC content, % | Intact genes | Gene names                                                                                      | GenBank accession no. | Unique? |
|--------|----------------|------------|---------------|--------------|-------------------------------------------------------------------------------------------------|-----------------------|---------|
| BRP    | 63             | 64,875     | 42.50         | 0            | —                                                                                               | KP053887              | Y       |
| OSR    | 1              | 191,963    | 40.70         | 3            | <i>ccmB-a</i> , <i>rpl5-1</i> , <i>cob</i>                                                      | NC_016393             | N       |
| OSR    | 2              | 161,299    | 40.66         | 1            | <i>ccmFc</i> (exon 1, 2)                                                                        | NC_016396             | N       |
| OSR    | 3              | 153,996    | 41.17         | 1            | <b><i>nad1</i> (exon 2, 3), <math>\Psi</math><i>rps4</i>, <math>\Psi</math><i>trnI</i>(CAT)</b> | NC_016348             | N       |
| OSR    | 4              | 152,707    | 41.25         | 1            | <i>nad5</i> (exon 1, 2)                                                                         | NC_016397             | N       |
| OSR    | 5              | 148,612    | 41.22         | 3            | <i>trnfM</i> (CAT), <i>rrn18-b</i> , <i>rrn5-b</i>                                              | NC_016372             | N       |
| OSR    | 6              | 147,958    | 40.80         | 2            | <i>atp9</i> , <i>nad1</i> (exon 5)                                                              | NC_016355             | N       |
| OSR    | 7              | 146,587    | 41.03         | 2            | <b><i>cox3</i>, <i>atp8</i>, <math>\Psi</math><i>trnfM</i>(CAT)</b>                             | NC_016381             | N       |
| OSR    | 8              | 145,239    | 41.10         | 1            | <i>nad5</i> (exon 4, 5)                                                                         | NC_016390             | N       |
| OSR    | 9              | 142,006    | 40.70         | 2            | <i>nad2</i> (exon 1, 2), <i>nad6</i>                                                            | NC_016382             | N       |
| OSR    | 10             | 140,341    | 40.78         | 1            | <i>ccmC</i>                                                                                     | NC_016349             | N       |
| OSR    | 11             | 138,824    | 41.08         | 1            | <i>nad9</i>                                                                                     | NC_016377             | N       |
| OSR    | 12             | 134,806    | 41.14         | 1            | <i>nad4</i> (exon 1, 2, 3)                                                                      | NC_016345             | N       |
| OSR    | 13             | 130,152    | 40.81         | 0            | —                                                                                               | NC_016363             | N       |
| OSR    | 14             | 130,008    | 40.25         | 0            | <b><math>\Psi</math><i>trnN</i>(GTT), <math>\Psi</math><i>trnQ</i>(TTG)</b>                     | NC_016171             | N       |
| OSR    | 15             | 129,012    | 40.81         | 0            | —                                                                                               | NC_016384             | N       |
| OSR    | 16             | 128,843    | 40.33         | 1            | <i>rrn26-a</i>                                                                                  | NC_016365             | N       |
| OSR    | 17             | 127,930    | 40.03         | 0            | —                                                                                               | NC_016346             | N       |
| OSR    | 18             | 127,245    | 40.40         | 0            | —                                                                                               | NC_016357             | N       |
| OSR    | 19             | 127,193    | 42.28         | 1            | <i>cox1</i> , <b><math>\Psi</math><i>mttB-2</i></b>                                             | NC_016398             | N       |
| OSR    | 20             | 126,609    | 40.64         | 1            | <i>rrn26-d</i>                                                                                  | NC_016368             | N       |
| OSR    | 21             | 126,452    | 40.58         | 0            | —                                                                                               | NC_016389             | N       |
| OSR    | 22             | 122,890    | 40.35         | 1            | <i>nad5</i> (exon 3)                                                                            | NC_016352             | N       |
| OSR    | 23             | 122,485    | 40.60         | 1            | <i>mttB-1</i>                                                                                   | NC_016364             | N       |
| OSR    | 24             | 119,408    | 40.69         | 0            | <b><math>\Psi</math><i>rpl5-2</i></b>                                                           | NC_016360             | N       |
| OSR    | 25             | 115,341    | 40.98         | 1            | <i>nad7</i> (exon 1, 2, 3, 4)                                                                   | NC_016359             | N       |
| OSR    | 26             | 114,914    | 40.81         | 0            | —                                                                                               | NC_016383             | N       |
| OSR    | 27             | 113,308    | 42.15         | 2            | <i>matR</i> , <i>nad1</i> (exon 4)                                                              | NC_016391             | N       |
| OSR    | 28             | 108,290    | 41.02         | 2            | <i>rrn18-d</i> , <i>rrn5-d</i>                                                                  | NC_016374             | N       |
| OSR    | 29             | 108,152    | 41.25         | 1            | <i>nad1</i> (exon 1)                                                                            | NC_016362             | N       |
| OSR    | 30             | 108,040    | 40.58         | 0            | —                                                                                               | NC_016354             | Y       |
| OSR    | 31             | 107,738    | 40.08         | 0            | —                                                                                               | NC_016361             | Y       |
| OSR    | 32             | 106,477    | 40.57         | 1            | <i>nad3-a</i>                                                                                   | NC_016378             | N       |
| OSR    | 33             | 104,288    | 40.96         | 1            | <i>rrn26-b</i> , <b><math>\Psi</math><i>trnQ</i>(TTG)</b>                                       | NC_016366             | N       |
| OSR    | 34             | 103,926    | 40.70         | 1            | <i>trnI</i> -CAT                                                                                | NC_016401             | N       |
| OSR    | 35             | 103,557    | 40.05         | 0            | —                                                                                               | NC_016344             | Y       |
| OSR    | 36             | 103,548    | 40.22         | 1            | <i>rps13-1</i>                                                                                  | NC_016347             | Y       |
| OSR    | 37             | 103,320    | 40.70         | 0            | —                                                                                               | NC_016370             | N       |
| OSR    | 38             | 102,347    | 40.14         | 2            | <i>atp6</i> , <i>atp1</i>                                                                       | NC_016356             | N       |
| OSR    | 39             | 100,876    | 40.46         | 1            | <i>rps13-2</i>                                                                                  | NC_016379             | N       |
| OSR    | 40             | 100,579    | 41.45         | 3            | <i>trnfM</i> (CAT), <i>rrn18-a</i> , <i>rrn5-a</i>                                              | NC_016371             | N       |
| OSR    | 41             | 100,078    | 40.47         | 0            | —                                                                                               | NC_016350             | N       |
| OSR    | 42             | 98,550     | 40.59         | 1            | <i>ccmFn</i>                                                                                    | NC_016376             | N       |
| OSR    | 43             | 97,627     | 40.50         | 0            | <b><math>\Psi</math><i>rps3</i>, <math>\Psi</math><i>trnfM</i>(CAT)</b>                         | NC_016351             | N       |
| OSR    | 44             | 96,564     | 41.12         | 1            | <i>trnI</i> -CAT                                                                                | NC_016387             | N       |
| OSR    | 45             | 96,233     | 40.71         | 0            | —                                                                                               | NC_016392             | N       |
| OSR    | 46             | 95,084     | 40.92         | 0            | —                                                                                               | NC_016353             | Y       |
| OSR    | 47             | 94,621     | 41.15         | 2            | <i>nad2</i> (exon 3, 4, 5), <i>trnY</i> -GTA                                                    | NC_016358             | N       |
| OSR    | 48             | 94,201     | 39.91         | 0            | —                                                                                               | NC_016399             | N       |
| OSR    | 49             | 92,946     | 41.03         | 1            | <i>rrn26-e</i>                                                                                  | NC_016369             | N       |
| OSR    | 50             | 92,480     | 40.75         | 3            | <i>trnI</i> -CAT, <i>rrn18-e</i> , <i>rrn5-e</i> ,<br><b><math>\Psi</math><i>trnW</i>(CCA)</b>  | NC_016375             | N       |
| OSR    | 51             | 92,366     | 40.92         | 0            | —                                                                                               | NC_016388             | N       |
| OSR    | 52             | 91,804     | 41.15         | 1            | <i>rrn26-c</i>                                                                                  | NC_016367             | Y       |
| OSR    | 53             | 91,595     | 40.79         | 2            | <i>nad3-c</i> , <i>cox2</i>                                                                     | NC_016386             | N       |
| OSR    | 54             | 89,951     | 40.93         | 0            | —                                                                                               | NC_016400             | N       |
| OSR    | 55             | 86,782     | 39.77         | 1            | <i>nad3-b</i> , <b><math>\Psi</math><i>rps12</i></b>                                            | NC_016385             | N       |
| OSR    | 56             | 81,416     | 40.97         | 3            | <i>atp4-b</i> , <i>nad4L-b</i> , <i>ccmB-c</i> , <b><math>\Psi</math><i>trnI</i>(CAT)</b>       | NC_016395             | N       |
| OSR    | 57             | 74,922     | 40.57         | 2            | <i>rrn18-c</i> , <i>rrn5-c</i>                                                                  | NC_016373             | Y       |
| OSR    | 58             | 67,018     | 40.71         | 0            | <b><math>\Psi</math><i>trnfM</i>(CAT)</b>                                                       | NC_016380             | Y       |
| OSR    | 59             | 66,365     | 40.66         | 3            | <i>atp4-a</i> , <i>nad4L-a</i> , <i>ccmB-b</i>                                                  | NC_016394             | N       |

Gene names listed in bold text are apparent pseudogenes and are not included in reported counts of intact genes.

**Table S2. Summary of genes with duplicate copies**

| Gene                  | BRP  | OSR  |
|-----------------------|------|------|
| <i>atp4</i>           | 2    | 2    |
| <i>atp6</i>           | 3    | 1    |
| <i>ccmB</i>           | 3    | 3    |
| <i>ccmC</i>           | 2    | 1    |
| <i>ccmFn</i>          | 2    | 1    |
| <i>matR</i>           | 2    | 1    |
| <i>mttB</i>           | 2    | 2    |
| <i>nad1-exon4</i>     | 2    | 1    |
| <i>nad2-exon3-4-5</i> | 2    | 1    |
| <i>nad3</i>           | 2    | 3    |
| <i>nad4L</i>          | 2    | 2    |
| <i>nad5-exon3</i>     | 2    | 1    |
| <i>rpl5</i>           | 2    | 2    |
| <i>rps13</i>          | 1    | 2    |
| <i>rrn18</i>          | 6    | 5    |
| <i>rrn26</i>          | 4    | 5    |
| <i>rrn5</i>           | 6    | 5    |
| <i>trnfM</i>          | 4(2) | 5(3) |
| <i>trnI</i>           | 5(2) | 5(2) |

Bold values indicate duplicate copies that are not identical in sequence.

**Table S3. Summary of SNPs and indels between *S. noctiflora* BRP and OSR mitochondrial genomes by chromosome**

| BRP chromosome | OSR chromosome | Alignment length, bp  | SNPs          | Pairwise divergence, % | Indels      |
|----------------|----------------|-----------------------|---------------|------------------------|-------------|
| 1              | 1              | 191,178 (183,146)     | 53 (35)       | 0.0277 (0.0191)        | 69 (2)      |
| 2              | 2              | 160,871 (154,660)     | 47 (38)       | 0.0292 (0.0246)        | 56 (7)      |
| 3              | 3              | 153,941 (148,001)     | 38 (29)       | 0.0247 (0.0196)        | 51 (1)      |
| 4              | 4              | 152,629 (146,526)     | 40 (26)       | 0.0262 (0.0177)        | 64 (3)      |
| 5              | 5              | 148,528 (142,851)     | 60 (45)       | 0.0404 (0.0315)        | 56 (13)     |
| 6              | 6              | 147,876 (141,262)     | 44 (34)       | 0.0298 (0.0241)        | 77 (4)      |
| 7              | 8              | 145,173 (139,261)     | 38 (30)       | 0.0262 (0.0215)        | 55 (6)      |
| 8              | 9              | 140,321 (134,921)     | 60 (46)       | 0.0428 (0.0341)        | 35 (7)      |
| 9              | 10             | 139,856 (134,655)     | 65 (48)       | 0.0465 (0.0356)        | 55 (7)      |
| 10             | 11             | 138,770 (133,274)     | 14 (9)        | 0.0101 (0.0068)        | 54 (6)      |
| 11             | 12             | 134,706 (129,147)     | 44 (41)       | 0.0327 (0.0317)        | 54 (5)      |
| 12             | 13             | 129,997 (124,609)     | 157 (136)     | 0.1208 (0.1091)        | 90 (25)     |
| 13             | 14             | 129,916 (124,166)     | 17 (12)       | 0.0131 (0.0097)        | 73 (2)      |
| 18             | 15             | 126,779 (121,856)     | 24 (21)       | 0.0189 (0.0172)        | 30 (6)      |
| 17             | 16             | 126,896 (121,874)     | 24 (15)       | 0.0189 (0.0123)        | 72 (13)     |
| 14             | 17             | 127,898 (123,055)     | 65 (45)       | 0.0508 (0.0366)        | 14 (8)      |
| 15             | 18             | 127,139 (121,774)     | 178 (137)     | 0.14 (0.1125)          | 40 (3)      |
| 16             | 19             | 127,108 (123,761)     | 55 (45)       | 0.0433 (0.0364)        | 27 (3)      |
| 20             | 20             | 126,249 (120,618)     | 50 (35)       | 0.0396 (0.029)         | 67 (22)     |
| 19             | 21             | 126,331 (121,004)     | 72 (63)       | 0.057 (0.0521)         | 48 (5)      |
| 21             | 22             | 122,543 (117,773)     | 39 (31)       | 0.0318 (0.0264)        | 52 (7)      |
| 23             | 23             | 120,232 (115,404)     | 57 (40)       | 0.0474 (0.0347)        | 55 (3)      |
| 24             | 24             | 118,551 (113,467)     | 38 (31)       | 0.0321 (0.0273)        | 44 (7)      |
| 28             | 25             | 115,291 (110,105)     | 41 (30)       | 0.0356 (0.0272)        | 41 (4)      |
| 29             | 41             | 99,913 (95,730)       | 132 (106)     | 0.1321 (0.1107)        | 52 (21)     |
| 30             | 26             | 114,881 (110,284)     | 40 (28)       | 0.0348 (0.0254)        | 32 (1)      |
| 32             | 27             | 111,964 (108,369)     | 43 (40)       | 0.0384 (0.0369)        | 25 (11)     |
| 34             | 28             | 107,867 (103,455)     | 67 (57)       | 0.0621 (0.0551)        | 38 (4)      |
| 35             | 29             | 108,091 (103,682)     | 50 (39)       | 0.0463 (0.0376)        | 45 (9)      |
| 36             | 32             | 106,444 (101,975)     | 13 (9)        | 0.0122 (0.0088)        | 33 (2)      |
| 48             | 33             | 96,751 (93,336)       | 50 (37)       | 0.0517 (0.0396)        | 31 (5)      |
| 37             | 37             | 102,938 (98,933)      | 57 (46)       | 0.0554 (0.0465)        | 31 (1)      |
| 39             | 38             | 102,294 (98,371)      | 19 (15)       | 0.0186 (0.0152)        | 32 (5)      |
| 41             | 45             | 96,194 (91,940)       | 96 (78)       | 0.0998 (0.0848)        | 32 (1)      |
| 42             | 39             | 100,840 (96,744)      | 16 (13)       | 0.0159 (0.0134)        | 26 (3)      |
| 43             | 40             | 100,494 (96,472)      | 16 (14)       | 0.0159 (0.0145)        | 40 (6)      |
| 44             | 44             | 95,964 (91,991)       | 58 (52)       | 0.0604 (0.0565)        | 36 (8)      |
| 46             | 42             | 98,060 (93,901)       | 42 (36)       | 0.0428 (0.0383)        | 30 (7)      |
| 47             | 43             | 97,575 (93,677)       | 57 (36)       | 0.0584 (0.0384)        | 26 (7)      |
| 49             | 47             | 94,510 (90,422)       | 43 (33)       | 0.0455 (0.0365)        | 53 (6)      |
| 51             | 48             | 91,098 (86,923)       | 53 (45)       | 0.057 (0.0507)         | 43 (15)     |
| 52             | 49             | 92,884 (89,132)       | 37 (32)       | 0.0398 (0.0359)        | 27 (3)      |
| 54             | 50             | 92,286 (88,468)       | 31 (27)       | 0.0336 (0.0305)        | 28 (3)      |
| 53             | 51             | 92,336 (88,599)       | 57 (45)       | 0.0617 (0.0508)        | 33 (3)      |
| 55             | 53             | 91,549 (87,685)       | 14 (10)       | 0.0153 (0.0114)        | 36 (0)      |
| 56             | 54             | 88,975 (85,757)       | 398 (354)     | 0.4473 (0.4128)        | 105 (46)    |
| 58             | 55             | 73,705 (69,875)       | 44 (33)       | 0.0531 (0.0418)        | 38 (5)      |
| 59             | 34             | 78,100 (74,903)       | 70 (55)       | 0.0896 (0.0734)        | 27 (6)      |
| 60             | 56             | 81,379 (78,014)       | 41 (30)       | 0.0504 (0.0385)        | 28 (7)      |
| 62             | 59             | 65,222 (62,352)       | 67 (52)       | 0.1027 (0.0834)        | 36 (9)      |
| Total          |                | 5,761,093 (5,528,160) | 2,931 (2,344) | 0.0509 (0.0424)        | 2,242 (363) |

Values in parentheses are calculated after removal of homopolymer regions (*Materials and Methods*).

**Table S4. Summary of read depth for the single-copy regions of each chromosome in the *S. noctiflora* BRP mitochondrial genome**

| Chromosome | Length, bp | Mean read depth | Median read depth | SD read depth |
|------------|------------|-----------------|-------------------|---------------|
| 1          | 188,337    | 24.48           | 24                | 5.90          |
| 2          | 160,272    | 20.68           | 20                | 5.43          |
| 3          | 153,950    | 23.00           | 23                | 5.51          |
| 4          | 152,063    | 22.43           | 22                | 6.03          |
| 5          | 145,718    | 23.77           | 23                | 6.21          |
| 6          | 147,899    | 22.07           | 22                | 5.93          |
| 7          | 146,465    | 20.08           | 20                | 5.21          |
| 8          | 139,545    | 24.18           | 24                | 5.95          |
| 9          | 139,867    | 21.09           | 21                | 5.55          |
| 10         | 138,847    | 20.91           | 21                | 5.55          |
| 11         | 134,804    | 23.03           | 23                | 5.71          |
| 12         | 130,045    | 20.07           | 20                | 5.78          |
| 13         | 129,952    | 19.53           | 19                | 5.30          |
| 14         | 127,559    | 18.12           | 18                | 4.89          |
| 15         | 127,208    | 25.05           | 25                | 5.85          |
| 16         | 122,637    | 24.83           | 24                | 6.67          |
| 17         | 123,324    | 23.08           | 23                | 5.57          |
| 18         | 126,053    | 18.07           | 18                | 5.08          |
| 19         | 124,904    | 21.39           | 21                | 5.47          |
| 20         | 121,966    | 24.10           | 24                | 6.39          |
| 21         | 119,469    | 22.45           | 22                | 5.65          |
| 22         | 120,428    | 19.08           | 19                | 5.22          |
| 23         | 120,245    | 21.99           | 22                | 5.63          |
| 24         | 110,327    | 21.91           | 21                | 5.65          |
| 25         | 117,701    | 24.52           | 24                | 5.98          |
| 26         | 117,164    | 20.88           | 20                | 5.53          |
| 27         | 116,776    | 19.88           | 20                | 5.30          |
| 28         | 115,687    | 21.87           | 22                | 5.65          |
| 29         | 113,654    | 20.29           | 20                | 5.48          |
| 30         | 114,891    | 25.26           | 25                | 6.10          |
| 31         | 106,657    | 19.30           | 19                | 4.99          |
| 32         | 89,361     | 16.26           | 16                | 4.88          |
| 33         | 108,169    | 21.36           | 21                | 5.62          |
| 34         | 105,645    | 20.59           | 20                | 5.83          |
| 35         | 108,105    | 18.48           | 18                | 5.24          |
| 36         | 104,704    | 22.23           | 22                | 5.64          |
| 37         | 103,264    | 19.66           | 19                | 5.30          |
| 38         | 99,401     | 16.49           | 16                | 4.62          |
| 39         | 101,906    | 23.22           | 23                | 6.14          |
| 40         | 101,096    | 21.25           | 21                | 5.33          |
| 41         | 98,560     | 18.73           | 18                | 5.17          |
| 42         | 101,035    | 17.38           | 17                | 5.02          |
| 43         | 97,426     | 21.56           | 21                | 5.56          |
| 44         | 97,250     | 16.99           | 17                | 5.05          |
| 45         | 93,322     | 20.80           | 20                | 5.45          |
| 46         | 97,701     | 15.22           | 15                | 4.18          |
| 47         | 97,126     | 17.81           | 18                | 4.75          |
| 48         | 96,769     | 14.97           | 15                | 4.73          |
| 49         | 94,316     | 20.47           | 20                | 5.56          |
| 50         | 90,874     | 24.38           | 24                | 6.13          |
| 51         | 89,277     | 21.35           | 21                | 5.70          |
| 52         | 86,046     | 21.35           | 21                | 5.16          |
| 53         | 90,208     | 20.16           | 20                | 5.45          |
| 54         | 87,668     | 20.66           | 20                | 5.74          |
| 55         | 88,886     | 19.97           | 20                | 5.19          |
| 56         | 85,565     | 23.82           | 24                | 5.39          |
| 57         | 85,966     | 15.75           | 15                | 4.69          |
| 58         | 82,018     | 21.79           | 21                | 5.64          |
| 59         | 81,689     | 23.63           | 23                | 5.34          |
| 60         | 73,153     | 17.60           | 17                | 4.85          |
| 61         | 51,443     | 12.22           | 12                | 3.93          |
| 62         | 58,932     | 14.46           | 14                | 4.91          |
| 63         | 63,513     | 13.99           | 14                | 4.33          |

All values are calculated after excluding repeated sequences in each chromosome (*Materials and Methods*).

**Table S5. ANOVA table from comparison of estimated copy numbers from absolute qPCR assays of *S. noctiflora* BRP mitochondrial chromosomes 30 and 61**

| Effect                          | df | SS         | MS         | F      | P      |
|---------------------------------|----|------------|------------|--------|--------|
| Biological replicate            | 1  | 1,950,730  | 1,950,730  | 31.44  | <0.001 |
| Chromosome                      | 1  | 13,674,126 | 13,674,126 | 220.41 | <0.001 |
| Marker (chromosome)             | 4  | 2,042,877  | 510,719    | 8.23   | <0.001 |
| Biological replicate*chromosome | 1  | 3,226      | 3,226      | 0.05   | 0.82   |
| Residuals                       | 28 | 1,737,075  | 62,038     |        |        |

MS, mean square; SS, sum of squares.

\*Indicates an interaction between the two effects.







**Table S9. PCR primer sequences**

| Primer name                                                      | Primer sequence           |
|------------------------------------------------------------------|---------------------------|
| <b>qPCR primers for screening 7 mitochondrial chromosomes</b>    |                           |
| OSR.37.3F                                                        | AGGGGAAGAAACCGAGTAAGAACT  |
| OSR.37.3R                                                        | ACGTACTGGAATGAGTAGGCGATT  |
| OSR.37.4F                                                        | ACTTAGTAATGAACCGTGCGTGAG  |
| OSR.37.4R                                                        | GTTTGCATAACGGTGTATTATCCA  |
| OSR.37.5F                                                        | CAAGGGTAGCAAAGTGAGTGAAAG  |
| OSR.37.5R                                                        | ATCTAAGCTCACAAGCAAATACCG  |
| OSR.38.1F                                                        | TCTTTTCCGAGGACTCTTAATTGC  |
| OSR.38.1R                                                        | AAGCGGAAAAGATTTGTAGGTAG   |
| OSR.38.2F                                                        | AATAGCATCCATACCCATTCGTCT  |
| OSR.38.2R                                                        | CCAGTCGAGCATGAAGACAATTTA  |
| OSR.38.3F                                                        | GCAACAGTTTCTGGACTAAGGACA  |
| OSR.38.3R                                                        | AAGTCTTGGTGAATTCCTTTGCTT  |
| OSR.47.1F                                                        | AAGAAAGCCTTCAACTAAGGAGCA  |
| OSR.47.1R                                                        | CCCGCTGTTTATCTTGTAACTTC   |
| OSR.47.2F                                                        | TATGGTCATGGTTTCCATATGCTG  |
| OSR.47.2R                                                        | ATGATTGTGAGTCAACCGTAAGA   |
| OSR.47.3F                                                        | ATCTACTCGCCCAATCAAAATTA   |
| OSR.47.3R                                                        | ACGGGATGTTCACTAAGCCTCTAC  |
| BRP.28.1F                                                        | TTATAGGCGCGGTGATATAGTCT   |
| BRP.28.1R                                                        | GGAAACTGTTGCTTACCCGTATTC  |
| BRP.28.2F                                                        | AACGTTTGCATCATAAAGAGGAGA  |
| BRP.28.2R                                                        | TGCTTTATAGTGGATCCTGAGTGC  |
| BRP.28.3F                                                        | CAGGACTCTCTGTCTGGGGTTAAT  |
| BRP.28.3R                                                        | AGATTGAGATAGAGCCTTGGGTGA  |
| BRP.31.2F                                                        | ATTTTGTGCGGGAGTCTCTCAGT   |
| BRP.31.2R                                                        | CTTCTCTGATGCCTCAAGGTGT    |
| BRP.31.3F                                                        | AGCCATCCCCTAATGTAACCTCC   |
| BRP.31.3R                                                        | GGCAATCCCTTGCTAGCTTAGT    |
| BRP.31.4F                                                        | AAAATACTGCGGGCTTACGTTTAG  |
| BRP.31.4R                                                        | ATCTTGGGAGAGATGCAAGTGTAG  |
| OSR.30.1F                                                        | AAAGGGTTCGTCTTGTGAAAGAG   |
| OSR.30.1R                                                        | AAAGGTGCTCTGGTGACACATATC  |
| OSR.30.2F                                                        | TCTTACCTCCATGAAAGAAAGCAA  |
| OSR.30.2R                                                        | TAAGACATAAGGCAGCTGTTCTGC  |
| OSR.30.3F                                                        | GAGCAGTATGCTCTGATACCAACC  |
| OSR.30.3R                                                        | AACTGGTAATGGTTGCAGGGTAAT  |
| OSR.35.1F                                                        | GCCCAATCAAATTCACAAATACA   |
| OSR.35.1R                                                        | CTCTTGCTATCGAGCATCAAGGTA  |
| OSR.35.2F                                                        | TCCCTGCCTGTAACCTTATACTTG  |
| OSR.35.2R                                                        | ATCTTAGAGACCCGCCATATTCCT  |
| OSR.35.3F                                                        | CAGCTTGTTCAAACAAAAGAAATGG |
| OSR.35.3R                                                        | GATGCTTTTGGTATCAATGCAAAG  |
| <b>qPCR primers for nuclear reference gene</b>                   |                           |
| SnX4_F                                                           | TTCCAGAGAAGCTTAGATCCGACT  |
| SnX4_R                                                           | GACAGTTGTCGGTGTCTCTGAAGT  |
| <b>Conventional and qPCR primers for absolute quantification</b> |                           |
| BRP.30_B_F24223                                                  | GCGGTCCGAAAATACCAATA      |
| BRP.30_B_R24872                                                  | GTGCCATTTCCCTTCTGAAA      |
| BRP.30_S_F24473                                                  | TATGACAGGCACAAGTTCAG      |
| BRP.30_S_R24594                                                  | TCCTGACCAGGCAAGCTACT      |
| BRP.30_B_F48037                                                  | GATGTGAGCCTTTCCTTTCG      |
| BRP.30_B_R48671                                                  | GGGCCATCTTTCCTTTAAGC      |
| BRP.30_S_F48465                                                  | AGCGACACTTGGACTCTGCT      |
| BRP.30_S_R48580                                                  | CGGGTCAATGAGTCTTCGTA      |
| BRP.30_B_F80866                                                  | GAAGCAGCTGGAATCGAGAC      |
| BRP.30_B_R81521                                                  | CGACCACTCTCCCTCAAGAA      |
| BRP.30_S_F81038                                                  | TGAACGAAAGCAGGTACAG       |
| BRP.30_S_R81157                                                  | TCTTTGGGAAAAAGCGAGAA      |
| BRP.61_B_F14252                                                  | AAGCCTGGCCACGTAGTTTA      |
| BRP.61_B_R14901                                                  | TTGCTGCTACTCGTAGGT        |
| BRP.61_S_F14666                                                  | ACCCGTTCCAATCCAACATA      |
| BRP.61_S_R14787                                                  | GCCAGCGTCCATAAGAGAAG      |

**Table S9. Cont.**

| Primer name                                              | Primer sequence         |
|----------------------------------------------------------|-------------------------|
| BRP.61_B_F26132                                          | CTCATGTACGCCCCATTCTT    |
| BRP.61_B_R26779                                          | CCACACACAACCAATCTCGT    |
| BRP.61_S_F26302                                          | CCTCCCCCTCGATTCTTTAG    |
| BRP.61_S_R26423                                          | ATGGGCAGTACGGTCTTTTG    |
| BRP.61_B_F41911                                          | GAAAGCCCGCTGTAGGTTA     |
| BRP.61_B_R42554                                          | GAAATGCGTGGAAATTCGTTT   |
| BRP.61_S_F42000                                          | CTTCCGCTTACGTCTTGGAC    |
| BRP.61_S_R42120                                          | GATTCTCGCTGGCTTGAAC     |
| Conventional PCR primers for genome assembly gap filling |                         |
| BRP.61_gap_F430                                          | AAGCGAGCGAGACTCTCAAC    |
| BRP.61_gap_R1062                                         | AGGGGTGGTTTCCACTAAG     |
| BRP.61_gap_F544                                          | TGAGGGTAGACTAATGGCTTGTT |
| BRP.61_gap_R1202                                         | AAGACTAGAAAGGGTCTTTTGCT |
